# Supplementary material for: Immunization with an adenovirus-vectored TB vaccine containing Ag85A-Mtb32 effectively alleviates allergic asthma
Source: PubMed Central journal article supplement (PMC5859035; doi:10.1007/s00109-017-1614-5), 2018-01-04
Supplement: 109_2017_1614_MOESM2_ESM.pdf [file 109_2017_1614_MOESM2_ESM.pdf]

1 **Title:** Immunization with an adenovirus-vectored TB vaccine containing  
2 Ag85A-Mtb32 effectively alleviates allergic asthma

3 **Journal Name:** Journal of Molecular Medicine

4 **Authors:** Yiling Zhang<sup>1,2,3¶</sup>, Ying Feng<sup>1,2¶</sup>, Liang Li<sup>1,2¶</sup>, Xianmiao Ye<sup>2</sup>,  
5 Jinlin Wang<sup>2</sup>, Qian Wang<sup>2</sup>, Pingchao Li<sup>1,2</sup>, Na Li<sup>1</sup>, Xuehua Zheng<sup>2</sup>, Xiang,  
6 Gao<sup>2</sup>, Chufang Li<sup>1</sup>, Feng Li<sup>4</sup>, Baoqing Sun<sup>1</sup>, Kefang Lai<sup>1</sup>, Zhong Su<sup>2</sup>,  
7 Nanshan Zhong<sup>1</sup>, Ling Chen<sup>1,2\*</sup>, and Liqiang Feng<sup>2\*</sup>

8 **Affiliations:**

9 <sup>1</sup>State Key Laboratory of Respiratory Disease, The First Affiliated  
10 Hospital of Guangzhou Medical University, Guangzhou, China,

11 <sup>2</sup>Guangzhou Institutes of Biomedicine and Health, Chinese Academy of  
12 Sciences, Guangzhou, China, <sup>3</sup>Department of Respiratory Medicine,  
13 Guizhou Provincial People's Hospital, Guiyang, China. <sup>4</sup>Institute of  
14 Infectious Diseases, Guangzhou Eighth people's Hospital, Guangzhou  
15 Medical University, China.

16 ¶These authors contributed equally to this work.

17 \*Correspondence should be addressed to:

18 L.F. (E-mail: [feng\\_liqiang@gibh.ac.cn](mailto:feng_liqiang@gibh.ac.cn); Tel: +86-20-32015289; Fax:  
19 [+86-20-32015299](tel:+86-20-32015299)), or L.C. (E-mail: [chen\\_ling@gibh.ac.cn](mailto:chen_ling@gibh.ac.cn); Tel:  
20 [+86-20-32015289](tel:+86-20-32015289); Fax: [+86-20-32015299](tel:+86-20-32015299)), Guangzhou Institutes of  
21 Biomedicine and Health, Chinese Academy of Sciences, 190 Kai Yuan  
22 Avenue, Science Park, Guangzhou, China.

24 **Supplementary Figure S2**

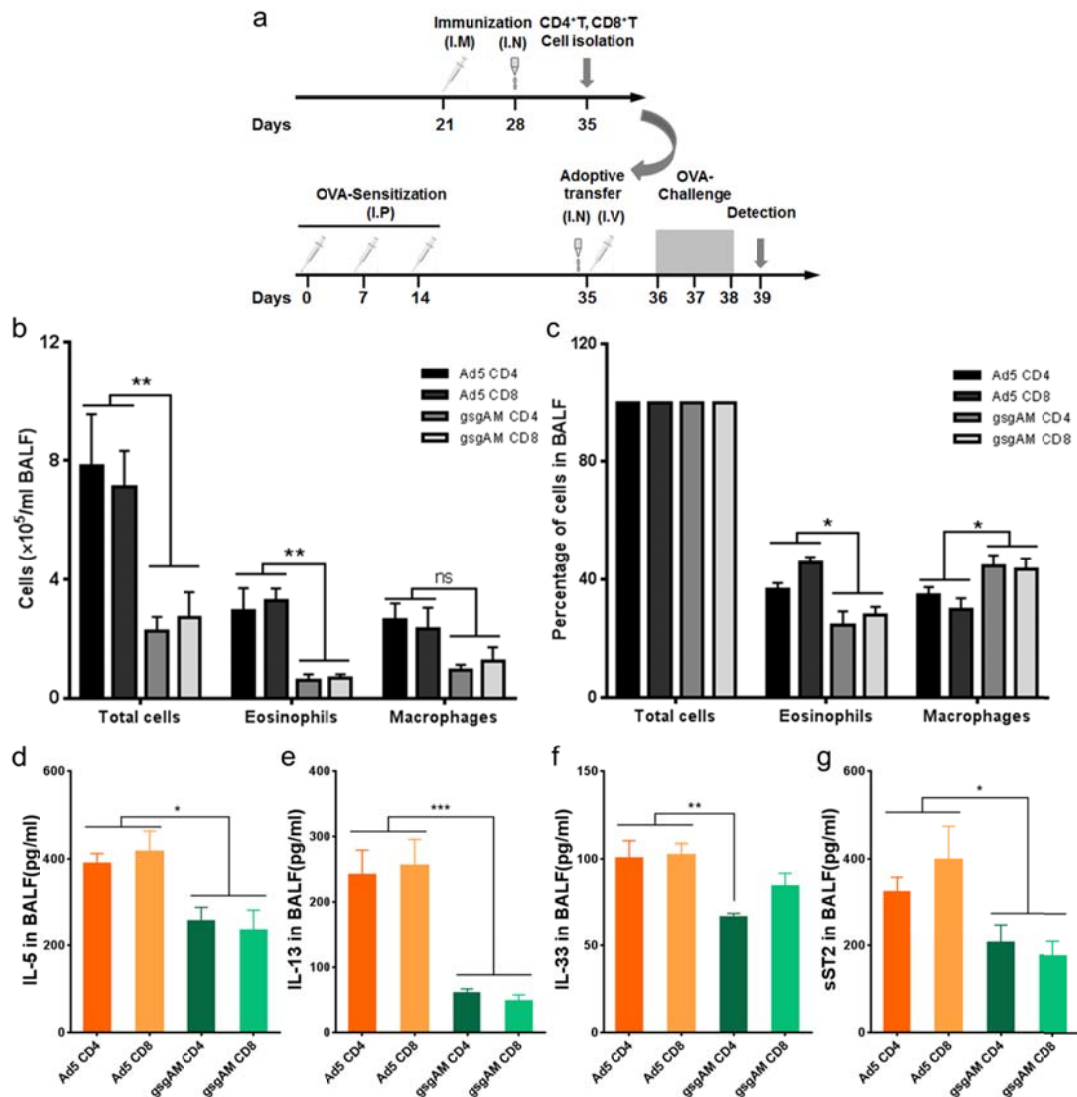

25

33 **Figure S2. Ad5-gsgAM-induced CD4<sup>+</sup>T and CD8<sup>+</sup>T cells showed**

34 **suppression on allergic airway inflammation.** 6-week-old mice were

35 immunized with Ad5-gsgAM or Ad5 through a prime-boost strategy. One

36 week after the final immunization, CD4<sup>+</sup>T and CD8<sup>+</sup>T cells were isolated

37 from the spleens and lungs. Another four groups of mice were sensitized

38 with OVA. One day before challenge, OVA-sensitized mice were

39 inoculated with CD4<sup>+</sup>T or CD8<sup>+</sup>T cells. One day after challenge, mice

40 were euthanatized and examined. **a** Schedules of immunization, T cell

33 isolation, adoptive transfer and detection. **b** The absolute numbers of total  
34 cells, eosinophils and macrophages in the BALFs were counted based on  
35 H&E staining. **c** The percentages of total cells, eosinophils and  
36 macrophages in the BALFs. **d-g** The contents of IL-5 (**d**), IL-13 (**e**),  
37 IL-33 (**f**), and sST2 (**g**) in the BALFs were determined by ELISA. Data  
38 are presented as the mean  $\pm$  SEM (n = 5 mice per group). Representative  
39 results from one of two independent experiments are shown. \*  $P < 0.05$ ,  
40 \*\*  $P < 0.01$ , \*\*\*  $P < 0.001$ . ns, no significance.

41
