# Supplementary material for: Immunization with an adenovirus-vectored TB vaccine containing Ag85A-Mtb32 effectively alleviates allergic asthma
Source: PubMed Central journal article supplement (PMC5859035; doi:10.1007/s00109-017-1614-5), 2018-01-04
Supplement: 109_2017_1614_MOESM3_ESM.pdf [file 109_2017_1614_MOESM3_ESM.pdf]

1 **Title:** Immunization with an adenovirus-vectored TB vaccine containing  
2 Ag85A-Mtb32 effectively alleviates allergic asthma

3 **Journal Name:** Journal of Molecular Medicine

4 **Authors:** Yiling Zhang<sup>1,2,3¶</sup>, Ying Feng<sup>1,2¶</sup>, Liang Li<sup>1,2¶</sup>, Xianmiao Ye<sup>2</sup>,  
5 Jinlin Wang<sup>2</sup>, Qian Wang<sup>2</sup>, Pingchao Li<sup>1,2</sup>, Na Li<sup>1</sup>, Xuehua Zheng<sup>2</sup>, Xiang,  
6 Gao<sup>2</sup>, Chufang Li<sup>1</sup>, Feng Li<sup>4</sup>, Baoqing Sun<sup>1</sup>, Kefang Lai<sup>1</sup>, Zhong Su<sup>2</sup>,  
7 Nanshan Zhong<sup>1</sup>, Ling Chen<sup>1,2\*</sup>, and Liqiang Feng<sup>2\*</sup>

8 **Affiliations:**

9 <sup>1</sup>State Key Laboratory of Respiratory Disease, The First Affiliated  
10 Hospital of Guangzhou Medical University, Guangzhou, China,

11 <sup>2</sup>Guangzhou Institutes of Biomedicine and Health, Chinese Academy of  
12 Sciences, Guangzhou, China, <sup>3</sup>Department of Respiratory Medicine,  
13 Guizhou Provincial People's Hospital, Guiyang, China. <sup>4</sup>Institute of  
14 Infectious Diseases, Guangzhou Eighth people's Hospital, Guangzhou  
15 Medical University, China.

16 ¶These authors contributed equally to this work.

17 \*Correspondence should be addressed to:

18 L.F. (E-mail: [feng\\_liqiang@gibh.ac.cn](mailto:feng_liqiang@gibh.ac.cn); Tel: +86-20-32015289; Fax:  
19 [+86-20-32015299](tel:+86-20-32015299)), or L.C. (E-mail: [chen\\_ling@gibh.ac.cn](mailto:chen_ling@gibh.ac.cn); Tel:  
20 [+86-20-32015289](tel:+86-20-32015289); Fax: [+86-20-32015299](tel:+86-20-32015299)), Guangzhou Institutes of  
21 Biomedicine and Health, Chinese Academy of Sciences, 190 Kai Yuan  
22 Avenue, Science Park, Guangzhou, China.

24 **Supplementary Figure S3**

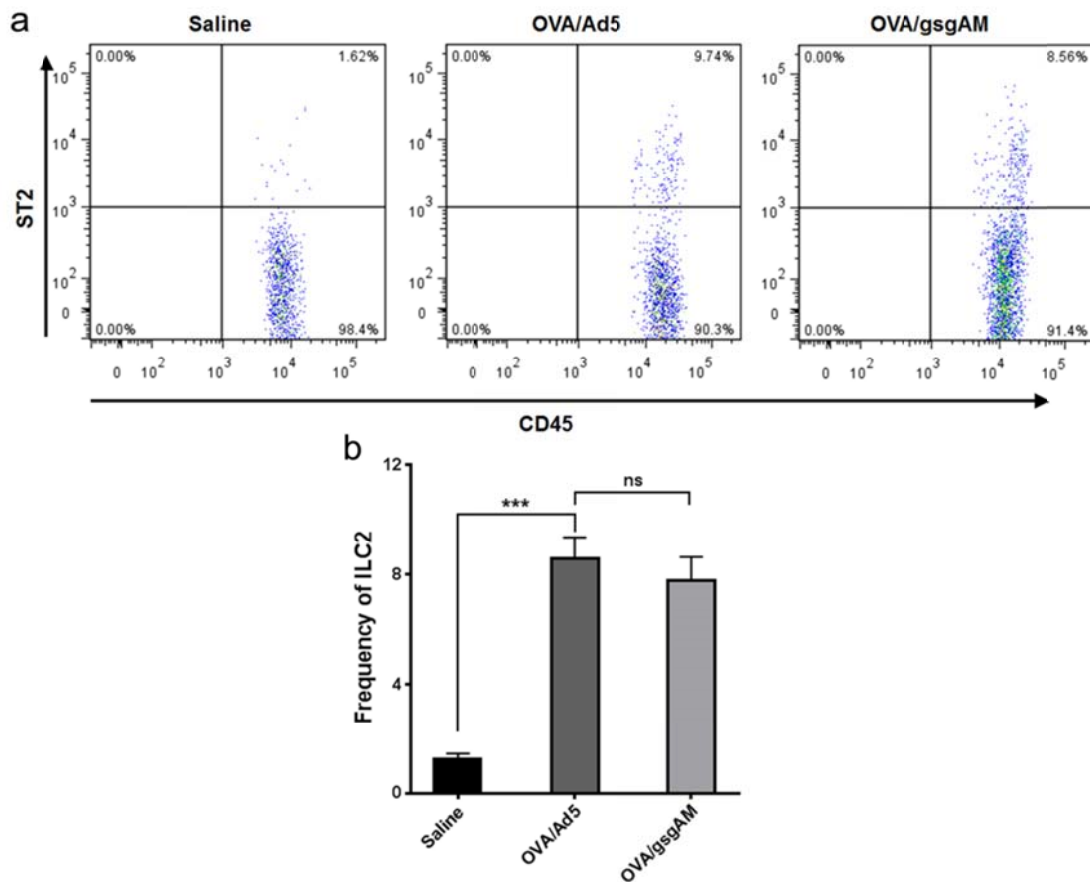

25

34 **Figure S3. Ad5-gsgAM immunization did not significantly inhibit**  
 35 **ILC2 recruitment.** Lymphocytes were isolated from the lungs of Saline,  
 36 OVA/Ad5 and OVA/gsgAM mice. The lymphocytes were stained with  
 37 lineage antibodies (CD3, CD4, CD8, CD11c, CD19, FcεRIα, Gr-1, NK1.1,  
 38 Ter-199) and antibodies to CD25, CD45 as well as ST2, and then  
 39 analyzed using flow cytometry. Lineage<sup>-</sup>CD25<sup>+</sup>CD45<sup>+</sup>ST2<sup>+</sup> cells were  
 40 designated as ILC2. **a** Representative dot plots of ILC2 from each group  
 41 of mice. **b** The frequency of ILC2s in Lineage<sup>-</sup>CD25<sup>+</sup> lung lymphocytes.  
 42 Data are presented as the mean ± SEM (n = 5 mice per group).

34 Representative results from one of two independent experiments are  
35 shown. \*\*\*  $P < 0.001$ . ns, no significance.
