# Supplementary material for: Immunization with an adenovirus-vectored TB vaccine containing Ag85A-Mtb32 effectively alleviates allergic asthma
Source: PubMed Central journal article supplement (PMC5859035; doi:10.1007/s00109-017-1614-5), 2018-01-04
Supplement: 109_2017_1614_MOESM4_ESM.pdf [file 109_2017_1614_MOESM4_ESM.pdf]

1 **Title:** Immunization with an adenovirus-vectored TB vaccine containing  
2 Ag85A-Mtb32 effectively alleviates allergic asthma

3 **Journal Name:** Journal of Molecular Medicine

4 **Authors:** Yiling Zhang<sup>1,2,3¶</sup>, Ying Feng<sup>1,2¶</sup>, Liang Li<sup>1,2¶</sup>, Xianmiao Ye<sup>2</sup>,  
5 Jinlin Wang<sup>2</sup>, Qian Wang<sup>2</sup>, Pingchao Li<sup>1,2</sup>, Na Li<sup>1</sup>, Xuehua Zheng<sup>2</sup>, Xiang,  
6 Gao<sup>2</sup>, Chufang Li<sup>1</sup>, Feng Li<sup>4</sup>, Baoqing Sun<sup>1</sup>, Kefang Lai<sup>1</sup>, Zhong Su<sup>2</sup>,  
7 Nanshan Zhong<sup>1</sup>, Ling Chen<sup>1,2\*</sup>, and Liqiang Feng<sup>2\*</sup>

8 **Affiliations:**

9 <sup>1</sup>State Key Laboratory of Respiratory Disease, The First Affiliated  
10 Hospital of Guangzhou Medical University, Guangzhou, China,

11 <sup>2</sup>Guangzhou Institutes of Biomedicine and Health, Chinese Academy of  
12 Sciences, Guangzhou, China, <sup>3</sup>Department of Respiratory Medicine,  
13 Guizhou Provincial People's Hospital, Guiyang, China. <sup>4</sup>Institute of  
14 Infectious Diseases, Guangzhou Eighth people's Hospital, Guangzhou  
15 Medical University, China.

16 ¶These authors contributed equally to this work.

17 \*Correspondence should be addressed to:

18 L.F. (E-mail: [feng\\_liqiang@gibh.ac.cn](mailto:feng_liqiang@gibh.ac.cn); Tel: +86-20-32015289; Fax:  
19 [+86-20-32015299](tel:+86-20-32015299)), or L.C. (E-mail: [chen\\_ling@gibh.ac.cn](mailto:chen_ling@gibh.ac.cn); Tel:  
20 [+86-20-32015289](tel:+86-20-32015289); Fax: [+86-20-32015299](tel:+86-20-32015299)), Guangzhou Institutes of  
21 Biomedicine and Health, Chinese Academy of Sciences, 190 Kai Yuan  
22 Avenue, Science Park, Guangzhou, China.

23 **Supplementary Materials and Methods.**

24

25 **Airway hyper-responsiveness**

26 One day after the final challenge, the AHR to inhaled methacholine  
27 (MCh) was measured using a single-chamber, whole-body  
28 plethysmography. In brief, the baseline values were recorded, and then  
29 the mice were successively exposed to PBS or doubled concentrations of  
30 MCh starting from 6.25 to 200mg/ml. At each concentration, the MCh  
31 aerosolization and incubation were each performed for 1min, and the  
32 animals were stimulated for 3min. Finally, the enhanced pause (Penh)  
33 was recorded and averaged for 3min. The results were normalized by  
34 subtracting the baseline values.

35

36 **Bronchoalveolar lavage, cell counting and histological examination**

37 One day after the final challenge, the bronchoalveolar lavage fluids  
38 (BALFs) were collected. In brief, the lungs were repeatedly lavaged (3  
39 times) with 0.8ml of chilled PBS. The recovered BALFs were centrifuged,  
40 and the cell pellets were re-suspended in PBS, counted by trypan blue dye  
41 exclusion, and then mounted onto slides. The monocytes, eosinophils,  
42 lymphocytes, and neutrophils were counted in a blinded manner using  
43 hematoxylin-eosin (H&E) staining. The cell-free BALFs were stored at  
44 -80°C for subsequent analysis.

45 The lung tissues were harvested and fixed overnight in 4%  
46 paraformaldehyde. After dehydration, the tissues were embedded,  
47 sectioned and stained with H&E or periodic acid-Schiff (PAS). The  
48 histological and PAS scores were determined in a blinded manner as  
49 follows: A. peribronchiolar infiltration (0, normal; 1,  $\leq 25\%$ ; 2, 25-75%;  
50 3,  $>75\%$ ); B. qualitative analysis (0, normal; 1,  $\leq 3$  cells thick in diameter;  
51 2, 3–10 cells thick; 3,  $>10$  cells thick); C. bronchiolar leakage (0, normal;  
52 1,  $\leq 25\%$ ; 2,  $>25\%$ ); D. perivascular infiltration (0, normal; 1,  $\leq 10\%$ ; 2,  
53 10-50%; 3,  $>50\%$ ); E. parenchymatous pneumonia (0, normal; 1, mild to  
54 moderate; 2, severe). The final scores were calculated as  $A+3 \times$   
55  $(B+C)+D+E$ . The PAS scores were calculated according to the percentage  
56 of PAS-stained goblet cells versus the epithelial cells in the airway (0,  
57  $<5\%$ ; 1, 5–25%; 2, 25–50%; 3, 50–75%; and 4,  $>75\%$  goblet cells). At  
58 least 5 random fields in each slide were counted, and the average of the  
59 airway scores were calculated (n=5 mice per group).

60

### 61 **ELISpot assay**

62 To detect the IFN- $\gamma$  and IL-4 releasing cells, 96-well plates (Merck  
63 Millipore, Billerica, MA) were activated and coated with anti-mouse  
64 IFN- $\gamma$  or IL-4 antibody (BD Biosciences, San Diego, CA) overnight at  
65 4°C. The lymphocytes from spleens and mediastinal lymph nodes (MLN)  
66 were isolated and seeded into the plates with the addition of OVA

67 (10 $\mu$ g/ml) or ConA (10ug/ml). After incubating for 24h for IFN- $\gamma$   
68 detection and 48h for IL-4 detection, the plates were developed with  
69 biotinylated anti-mouse IFN- $\gamma$  or IL-4 antibodies (BD Biosciences, San  
70 Diego, CA) and NBT/BCIP reagent (Pierce, Rockford, IL). Finally, the  
71 IFN- $\gamma$  or IL-4 releasing cells were counted by a plate reader (Bioreader  
72 4000, BIOSYS, Germany).

73

#### 74 **Quantification of iNOS and iNOS-expressing cells**

75 Lung tissues were harvested, homogenized and centrifuged at  
76 12000rpm at 4°C. The supernatants were collected and subjected to  
77 SDS-PAGE. The separated proteins were transferred onto nitrocellulose  
78 membranes and probed with monoclonal anti-iNOS or anti- $\beta$ -actin  
79 antibodies (Santa Cruz, Dallas, TX). The membrane was developed with  
80 a goat-anti-mouse IgG and detected using an ECL kit (Merck Millipore,  
81 Billerica, MA). The gel graphs were quantitatively analyzed using ImageJ  
82 software (NIH, Bethesda, MD). The density of each bands were read and  
83 the net band values were obtained by deducting the background value.  
84 The relative band value was then calculated as the ratio of the net band  
85 value of iNOS vs that of  $\beta$ -actin.

86 iNOS-expressing cells in the lung tissue sections were assessed as  
87 follows: Images of immuno-stained lung tissue sections from each group  
88 of mice (n = 4 to 6 mice per group) were randomly obtained by light

89 microscopy at 200× magnification. Four images of each mouse were  
90 counted for iNOS-positive cells in a blinded manner, and the average of  
91 the number of iNOS-positive cells in one square millimeter was  
92 calculated.

93

#### 94 **T cell adoptive transfer assay**

95 6-week-old female C57/BL6 mice were sensitized with OVA. Another  
96 age-matched mice were immunized with Ad5-gsgAM ( $2.5 \times 10^9$  viral  
97 particles per mouse) or Ad5 empty vector ( $2.5 \times 10^9$  viral particles per  
98 mouse) by a I.M priming plus I.N boost strategy at one-week interval.  
99 One week after the second immunization, T lymphocytes were isolated  
100 from the spleens and lungs. CD4<sup>+</sup>T and CD8<sup>+</sup>T cells were collected using  
101 CD4<sup>+</sup>T Cell Isolation Kit and CD4<sup>+</sup>T Cell Isolation Kit (Miltenyi Biotec,  
102 Auburn, CA) according to manufactory's instructions, respectively. After  
103 purification by negative selection, splenic and lung T cells were injected  
104 into OVA-sensitized recipient mice through intravenous and intranasal  
105 routes, respectively. Each recipient mice received a total of  $5 \times 10^6$   
106 splenic T cells and  $7 \times 10^5$  lung T cells. One day after T cell adoptive  
107 transfer, recipient mice were challenged with OVA for 3 consecutive days.  
108 One day after challenge, mice were sacrificed and the BALFs were  
109 collected and subjected to analysis.

110

111 **Analysis of group 2 innate lymphoid cells (ILCs)**

112 To analyze the ILC2s in the lungs, lymphocytes were isolated from the  
113 lungs of Saline, OVA/Ad5 and OVA/gsgAM mice.  $5 \times 10^6$  lymphocytes  
114 were stained with lineage antibodies including CD3-eFluor 450,  
115 CD4-eFluor 450, CD11c-eFluor 450, CD19-eFluor 450, FcεRIa-eFluor  
116 450, Gr-1-eFluor 450, NK1.1-eFluor 450, Ter-119-eFluor 450  
117 (ThermoFisher Scientific, Waltham, MA), CD8-PE (BD Biosciences, San  
118 Diego, CA), CD25-APC, CD45-FITC (ThermoFisher Scientific, Waltham,  
119 MA), and ST2-biotin (Biolegend, San Diego, CA). After incubation for  
120 30min at 4°C, the cells were washed with PBS and stained with APC/Cy7  
121 labelled streptavidin. Finally, the cells were washed and analyzed with a  
122 FACS Aria flow cytometer (BD Biosciences, San Diego, CA).
